# Supplementary material
Source: PubMed Central journal article supplement (PMC7790338)
Supplement: 134_2020_6325_MOESM1_ESM.pdf [file 134_2020_6325_MOESM1_ESM.pdf]

**Electronic Supplementary Material for:**

**Intensive Care Medicine**

**Sex differences in response to adjunctive corticosteroid treatment for patients with septic shock**

Kelly Thompson<sup>1,2</sup>, Balasubramanian Venkatesh<sup>1,2,3,4</sup>, Naomi Hammond<sup>1,2,5,6</sup>, Colman Taylor<sup>1,2</sup>, Simon Finfer<sup>1,2,6</sup>  
on behalf of the ADRENAL Investigators and sex-disaggregated analysis steering committee.

ADRENAL sex disaggregated analysis steering committee:

Severine Bompont,<sup>1</sup> Cheryl Carcel<sup>1,2</sup>, Jeremy Cohen<sup>1,2</sup>, Stephen Jan<sup>1,2</sup>, John Myburgh<sup>1,2,5</sup>, Sanne A.E. Peters<sup>2,7,8</sup>,  
Dorrilyn Rajbhandari<sup>1</sup>

1. The George Institute for Global Health, Sydney, Australia
2. University of New South Wales, Sydney, Australia
3. The Princess Alexandra Hospital, University of Queensland, Brisbane, Australia
4. The Wesley Hospital, Brisbane, Australia
5. St George Clinical School, University of New South Wales, Sydney, Australia
6. Malcolm Fisher Department of Intensive Care Medicine, Royal North Shore Hospital, Sydney, Australia
7. Julius Center for Health Sciences and Primary Care, University Medical Center Utrecht, Utrecht University, Utrecht, The Netherlands.
8. The George Institute for Global Health, Imperial College London, London, UK

Corresponding author: Kelly Thompson [kthompson@georgeinstitute.org](mailto:kthompson@georgeinstitute.org)

Orcid ID: <https://orcid.org/0000-0003-2304-8931>

## **Study committees and participating sites**

### **ADRENAL sex disaggregated analysis steering committee:**

Kelly Thompson (Chair), Balasubramanian Venkatesh, Colman Taylor, Jeremy Cohen, Naomi Hammond, Stephen Jan, Severine Bompont, Cheryl Carcel, Sanne Peters, John Myburgh, Dorrilyn Rajbhandari, Simon Finfer

**ADRENAL Management Committee:** Balasubramanian Venkatesh (Chair), Yaseen Arabi, Rinaldo Bellomo, Jeremy Cohen, Maryam Correa, Simon Finfer, Parisa Glass, Meg Harward, Christopher Joyce, Colin McArthur, John Myburgh, Anders Perner, Dorrilyn Rajbhandari, Andrew Rhodes, Kelly Thompson and Steve Webb.

### **The George Institute for Global Health, Sydney:**

Project and data management: Kelly Thompson, Dorrilyn Rajbhandari, Colman Taylor, Sarah Grattan, Ben Finfer, Ashwani Kumar, Jason Meyer, Meg Harward,

Statistical advice and support: Katie Harris, Mark Woodward

### **Participating Sites and Investigators:**

*Participating sites and investigators (Australia unless stated):*

Auckland City Hospital CVICU (New Zealand): Keri-Anne Cowdrey, Eileen Gilder, Stephanie Long, Lianne McCarthy, Shay McGuinness and Rachael Parke

Auckland City Hospital DCCM (New Zealand): Kristen Benefield, Yan Chen, Colin McArthur, Rachael McConnochie and Lynette Newby

Austin Hospital: Rinaldo Bellomo, Glenn Eastwood, Daryl Jones, Leah Peck and Helen Young

Bendigo Hospital: Catherine Boschert, John Edington, Jason Fletcher and Julie Smith

Blacktown Hospital: Dhaval Ghelani, Kiran Nand, Graham Reece and Treena Sara

Bristol Royal Infirmary (United Kingdom, England): Jeremy Bewley, Libby Cole, Lisa Grimmer, Lucy Howie, Shanaz James, Marta Kozlowski, Victoria Phillips, Sanjoy Shah, Katie Sweet and Denise Webster

Calvary Mater Hospital Newcastle: Irene Bailey, Katrina Ellem and Toni McKenna

Christchurch Hospital (New Zealand): Seton Henderson, David Knight, Jan Mehrrens, Emmeline Minto and Sascha Noble

Footscray Hospital: Zia Ansari, Samantha Bates, Craig French, Dashiell Gantner, Sathyajith Velandy Koottayi, Forbes McGain, John Mulder, Anna Tippett and Miriam Towns

Freeman Hospital - Newcastle upon Tyne (United Kingdom, England): Christine Boyd, Verity Calder, Kayla Harris, Carmen Scott and Stephen Wright

Fremantle Hospital / Fiona Stanley Hospital: Bart De Keulenaer, Edward Litton, Annamaria Palermo, and Adrian Regli

Geelong Hospital: Alison Bone, Claire Cattigan, Tania Elderkin, Melissa Fraser, Martina Ni Chonghaile, Neil Orford, and Tania Salerno

Gold Coast University Hospital: Maimoonbe Gough, Jody Paxton, Mandy Tallott and James Winearls

Gosford Hospital: Michael Bastick, Robert Cameron, Katrina Ellis, Atul Gaur, Rebecca Gregory, Jessica Naumoff and Mary White

Ipswich General Hospital: Neeraj Bhadange, Nandan Bhende, Umakant Bhutada, Anand Krishnan, Rebecca Nunn, Judith Ochola, Kristine Ryan, Tracey Sandford and Shannon Treay

John Hunter Hospital: Miranda Hardie, Peter Harrigan, Rachael Paton, Emma Pollock and Rachael Whyte

King Abdulaziz Medical City, Riyadh (Kingdom of Saudi Arabia): Fatimah Al Ehnidi, Farhan Al Enizi, Eman Al Qasim, Moudi Al Qahtani, Alawi Al Saeedi, Sami Al Solamy, Shmylan Alharbi, Yaseen Arabi, Maamoun Dbsawy, Samir Hadad, Mohammed Muhaidib, Shihab Mundekkan, Muath Najjar, Vusala Rzayeva, Musharaf Sadat and Sadaf Saedar

King Fahad Medical City (Kingdom of Saudi Arabia): Husain Abdulmutalib, Mohammed A. AlMaani, Alaa Ashraf B. AlQurashi, Hani Lababidi, and Pendo Ntinika

King Khalid University Hospital, King Saud University (Kingdom of Saudi Arabia): Ahmed Abdulmomen, Mariam Al-Ansari and Mohammad Hussein

King's College Hospital (United Kingdom, England): Alexander Chan, Clair Harris, Phillip Hopkins, Lucy Johnson, Clare Mellis, Leah Thompson, and Julia Wendon

Lewisham Hospital (United Kingdom, England): Richard Breeze, Michaela Heller, Mick Jennings, Waqas Khaliq, Ingrid Krupe, Ashraf Molokhia, Mathin Mostert, Rosie Reece-Anthony and Bernd Oliver Rose

Liverpool Hospital: Anders Aneman, Kerrie-Ann Bradshaw, Lien Lombardo, Claudia Lopez, Sharon Micallef, William O'Regan and Antony Stewart

Logan Hospital: Lynette Morrison, Kellie Sosnowski, Joanne Sutton and Hayden White

Lyell McEwin Hospital: Natalie Soar, Peter Thomas and Josette Wood

Mackay Hospital: Jacqueline Atkins, Stuart Baker and Neeraj Bhadange

Mater Health Services (Private), Brisbane: Melissa Finney, Kye Gregory, Amod Karnik, Megan Martin, John Morgan, Maria Pietsch, Jeffrey Presneill and David Sturgess

Mater Health Services (Public), Brisbane: Melissa Finney, Kye Gregory, Amod Karnik, Megan Martin and David Sturgess

Middlemore Hospital (New Zealand): Jefferson Aguila, Bernadette Clatworthy, Anisha Dias, Chantal Hogan, Alex Kazemi, Emmanuel Pelayo, Laura Rust, Rima Song, Anna Tilsley and Tony Williams

Monash Medical Centre: Hesham Abdelrahman, Lauren Bulfin, Tim Crozier, Darcy Davey, Jonathan Devine, Dhiraj Dwwivedi, Suzanne Elliott, David Ernest, Michelle Fernando, Kelli Fenech, Pauline Galt, Maja Green, Tammy Lamac, Klaudija Lavrans, Oakleigh Mullan, Paul Ritchie, Stephen Thornhill, Craig Walker, Huichun Wang, Stuart Wilson and Naomi Yarwood

Nambour General Hospital: Jane Brailsford, Anne Buckley, Loretta Forbes, Peter Garrett, John Moore and Lauren Murray

Nepean Hospital: Rebecca Gresham, Julie Lowrey, Kristy Masters, Ian Seppelt, Fiona Symonds, Leonie Weisbrodt and Christina Whitehead

North Shore Hospital (New Zealand): Jeanette Bell, Sheila Caniba, Maud Carpenter, Danielle Hacking, Janet Liang, and Caroline Thomas

Northern Hospital: Olga Burgess, Angaj Ghosh, John Green, Vanessa Leonard-Roberts, Mary Park and Simone Said

Prince Charles Hospital: Amanda Corley, Lizanne Dalglish, Melannie Edwards, John Fraser, Paul Jarrett, India Lye, David Sellers, Amy Spooner and Marc Ziegenfuss

Prince of Wales Hospital: Maria Albania, Sumesh Arora, Michelle Campbell, Yahya Shehabi, Yi Shi and Nicola Straiton

Princess Alexandra Hospital: Chris Joyce, Jason Meyer, Kelly Perkins, Emma Saylor, Bala Venkatesh, Ellen Venz, James Walsham, and Krista Wetzig

Queen Alexandra Hospital - Portsmouth (United Kingdom, England): David Pogson, Lindsey Roberts and Steve Rose

Queen Elizabeth Hospital - Birmingham (United Kingdom, England): Amy Bamford, Colin Bergin, Ronald Carrera, Lauren Cooper, Liesl Despy, Karen Ellis, Samantha Harkett, Peter Ip, Philip Pemberton, Martin Pope, Emma Reeves, Catherine Snelson, Elaine Spruce, Arlo Whitehouse and Tony Whitehouse

Redcliffe Hospital: Maree Duroux, Hamish Pollock, Megan Ratcliffe and Tim Warhurst

Rigshospitalet (Denmark): Björn Anders Brand, David Lavarett Buck, Vibeke Christiansen, Jette Fredlund Degn, Sofie Riis Jessiman, Maj-Brit Nørregaard Kjær, Vibeke Knudsen, Martin Bruun Madsen, Charlotte Benedikte Mørch Merie, Morten Hylander Møller, Rasmus Müller, Jonas Nielsen, Lizette Helbo Nislev, Anders Perner, Lars Quist, Kis Rønn Uhre, Sofie Louise Rygård, Anne Sofie Svanekier, Hans-Christian Thorsen-Meyer and Jonathan White

Royal Adelaide Hospital: Marianne Chapman, Sarah Doherty, Kathleen Glasby, Sonya Kloeden, Stephanie O'Connor, Alex Poole, Justine Rivett and Krishnaswamy Sundararajan

Royal Brisbane & Women's Hospital: Jenie Butler, Jeremy Cohen, Rachael Dunlop, Paul Jarrett, Melissa Lassig-Smith, Amelia Livermore, Therese Starr and Janine Stuart

Royal Darwin Hospital: Sidharth Agarwal, Margaret Phillips, Dianne Stephens and Jane Thomas

Royal Gwent Hospital (United Kingdom, Wales): Nicholas Mason and Una Gunter

Royal Hobart Hospital: David Cooper and Rick McAllister

Royal Melbourne Hospital: James Anstey, Deborah Barge, Jai Darvall, Rohit D'Costa, Kieron Gorman, Nerina Harley, Andrea Jordan, Christian Karcher, Christopher MacIsaac, Thomas Rechnitzer and Shyamala Sriram

Royal North Shore Hospital: Frances Bass, Simon Bird, Celia Bradford, Anthony Delaney, Simon Finfer, Naomi Hammond, Roger Harris, Anne O'Connor, Maz Razivian, Sarah Wesley and Elizabeth Yarad

Royal Perth Hospital: Chris Allen, Michelle Barr, Jenny Chamberlain, Janet Ferrier, Elizabeth Jenkinson, Edward Litton, Swapna Mathew, Soumya Ray, Anne Marie Sommers, Louise Wallace, Sharon Waterson and Steve Webb

Royal Prince Alfred Hospital: Heidi Buhr, Jennifer Coakley, Jennifer Coles, Mark Daley, David Gattas, Robert Hislop, Debra Hutch, Megan Keir, Heike Koelzow, Mark Lucey, Margherita Murgo, Michael O'Leary, Paul Phipps, Nudrat Rashid, Máté Rudas, Sanjay Tarvade, Richard Totaro, Clive Woolfe and James Wun

Royal Surrey County Hospital (United Kingdom, England): Ben Creagh-Brown, Nancileigh Doyle, Lui Forni, Christina Hughes, Daniel Hull, Justin Kirk-Bayley, Laura Montague and Eleanor Radford

St George Hospital: Deborah Inskip, Jennene Miller, John Myburgh and Manoj Saxena

St George's Trust NHS (United Kingdom, England): Hollmann Aya, Maurizio Cecconi, Nora Di Tomasso, Helen Farrah, Fabrizio Iannuccelli, Joao Macedo, Johannes Mellinghoff, Narenduth Poonuth, Sarah Pruden, Andrew Rhodes and Veronica Robinson-Barnes

St John of God Hospital Murdoch: Annamaria Palermo and Adrian Regli

St Peter's Hospital - Surrey (United Kingdom, England): Catherine Gray, Philomena Mweu, Emily Whisker and Ian White

St Thomas' Hospital (United Kingdom, England): Ursula Blanco Alonso, Aneta Bociek, Kathryn Chan, Kate Flynn, Anna Hall, Jessica Hall, Naomi Hare, Andrea Kelly, Katie Lei, Marlies Ostermann, Nicola Purchase, John Smith, Samantha Smith and Duncan Wyncoll

St Vincent's Hospital (Melbourne): Barry Dixon, Espedito Faraone, Jennifer Holmes, John Santamaria, Roger Smith and Antony Tobin

St Vincent's Hospital (Sydney): Serena Knowles, Serene Leow, Karlee McCann, Priya Nair and Claire Reynolds

Sunshine Hospital: Zia Ansari, Samantha Bates, Craig French, Dashiell Gantner, Sathyajith Velandy Koottayi, Forbes McGain, John Mulder, Anna Tippett and Miriam Towns

Tamworth Rural Hospital: Grant Cave, Tim Constable, Phil Hungerford, Amit Kansal, Peter May, Viji Rao and Chris Trethewy

Tauranga Hospital (New Zealand): Troy Browne, Jennifer Goodson and Shirley Nelson

The Queen Elizabeth Hospital: Catherine Kurenda, Joanne McIntyre, Sandra Peake, Jennie Phillips-Hughes and Tricia Williams

The Tweed Hospital: Rand Butcher, Belinda Foley, Cassandra Lillis, Kerrie Martin, Brunhilde Mulhall, Rebekah Napier, Joe Ogg and Karen Vallance

The Wesley Hospital: Amanda Davie, Alison Leech, Elyse Matsen, Amy Owens, Roslyn Purcell and Bala Venkatesh

Toowoomba Hospital: Vasanth Mariappa and Judy Smith

Townsville Hospital: Kimberly Bury, Shane Finnigan, Elizabeth Heyer, Leonie Jones, Nadine Laffin, Clare Newton and Siva Senthuran

University Hospital Southampton (United Kingdom, England): Clare Bolger, Rebecca Cusack, Max Jonas and Karen Salmon

Waikato Hospital (New Zealand): Jewel Barlow-Armstrong, John Durning, Mary La Pine and Tom O'Rourke

Wellington Hospital (New Zealand): Lynn Andrews, Richard Dinsdale, Caitlin Firkin, Anna Hunt, Sally Hurford, Adelaide Jason-Smith, Eden Lesona, Diane Mackle, Agnes McKay Vucago, Lean Navarra, Raulle Sol Cruz and Paul Young

Wollongong Hospital: Michael Davis, Wenli Geng, Samantha Jakimowicz, Bronwyn Johnson, Clare Merriman and Martin Sterba

## Supplementary Methods

### Methods

This was a post-hoc analysis of data from the ADRENAL trial (NCT01448109). ADRENAL was an Australian and New Zealand Intensive Care Society Clinical Trials group endorsed investigator-initiated, blinded, randomised controlled trial comparing a 7 day continuous infusion of 200 mg daily of hydrocortisone or placebo on all-cause mortality at 90 days in 3800 patients with septic shock. The study was conducted in 69 ICUs across Australia, Denmark, New Zealand, Saudi Arabia and the United Kingdom. A detailed description of study methods and results have been previously reported [1, 2].

For the analyses of healthcare resource use and costs, we included 1488 patients enrolled in ADRENAL in the Australian states of New South Wales and Queensland, where data on ongoing healthcare resource use and costs were available by linking the trial and government hosted administrative health databases.

Human research ethics committee approval was obtained for all participating sites. Written informed consent or consent to continue after randomisation was obtained in accordance with local requirements. Ethical approval for data linkage to administrative health records was obtained separately for participating sites in New South Wales and Queensland.

Sex was determined as the legal gender as listed on the participants birth certificate. We recognise the terms sex and gender are inter-related and often confused. We respectfully refer to sex and/or gender as sex in this manuscript.

ICU and hospital outcomes included the frequency and duration of shock, mechanical ventilation and renal replacement therapy, the receipt of blood transfusions and the number of days alive and free of mechanical ventilation, renal replacement therapy, ICU and hospital at 90-days post randomisation.

Recurrence of shock was defined as a new episode of haemodynamic instability requiring treatment with inotropes or vasopressors, after resolution of the initial episode. Recurrence of mechanical ventilation was defined as the proportion of patients requiring re-institution of mechanical ventilation, where mechanical ventilation was defined as being treated with mechanical ventilation at the time of randomisation (including both via presence of an endotracheal tube or non-invasive ventilation with bi-level of continuous positive airway pressure).

Health-related quality-of-life was assessed in survivors using the EuroQoL 5-dimension 5-level Group Association Questionnaire (EQ-5D-5L) [3, 4]. The EQ-5D-5L collates responses to five health-related quality-of-life domains of mobility, self-care, usual activities, pain or discomfort, and anxiety or depression scored across five levels (no problems, slight problems, moderate problems, severe problems, extreme problems or unable to perform the activity). Responses were grouped in categories of no/slight problems and moderate/extreme problems. Health-related quality-of-life utility values were also calculated using the Australian reference algorithm [5], with zero equivalent to death and one indicating full health. Patients who died during the trial were assigned a utility value of zero.

#### *Healthcare resource use and economic outcomes*

Healthcare resource use data were collected from the ADRENAL trial database and administrative health records in New South Wales and Queensland through the admitted patient database for a period of 6-months after randomisation. Outcomes included the duration of stay in the ICU and hospital for the initial admission, subsequent admissions to ICU and hospital and the duration of these admissions.

Costs included those incurred for hospital and ICU admissions up to 6-months after inclusion in the ADRENAL trial. Hospital and ICU costs were calculated using Australian Refined Diagnostic Related Group reimbursement costings [6, 7]. Cost information is reported in Euros (€) converted from the Australian dollar (A\$) value on October 6th, 2017 (the date of last patient follow-up). As at that date, A\$1 = €0.66.

### *Statistical analysis*

The analysis was conducted using methods previously described [8]. Baseline characteristics are reported by sex for all participants enrolled in the ADRENAL trial. A comparison of baseline characteristics and outcomes for patients enrolled in New South Wales and Queensland is provided in the supplement.

For continuous variables, general linear models were used to estimate mean differences, with 95% confidence intervals (95% CIs), between patients in the hydrocortisone or placebo groups for each sex separately, and then as the mean sex difference (women minus men) in treatment differences. For binary data, logistic regression was used to estimate odds ratios (ORs), with 95% CIs, comparing those in the hydrocortisone to those in the placebo group for each sex separately, and then as the ratios of odds ratios (RORs), women compared to men. The time to resolution of shock, mechanical ventilation and discharge from ICU and hospital were analysed using Cox proportional hazards models, with the Fine and Gray method [9] used to account for the competing risk of death. Time to event analyses are reported for each sex separately as the reciprocal of the subdistribution hazard ratio (sHR) (all ORs and HRs less than 1.0 favour hydrocortisone) [10], with 95% CIs, and then as the ratio of sHR (RsHR), women compared to men.

All analyses were adjusted for pre-specified clinically relevant variables (age, Acute Physiology And Chronic Health Evaluation [APACHE] II score [11], and treatment with renal replacement therapy) and for variables that differed between women and men at baseline (weight, admission source, first site of infection, time from ICU admission to randomisation, heart rate, lowest mean arterial pressure, lowest PaO<sup>2</sup>/FiO<sup>2</sup> ratio, highest arterial lactate, highest creatinine, lowest haemoglobin, lowest platelets and statin therapy prior to enrolment). Baseline variables were recorded from data collected in the 24 hours prior to randomisation. We tested for the interaction between treatment and sex for all outcomes, reported as p-values. SAS Enterprise Guide 7.1 was used for the analyses.

**Supplementary Figure 1: Consort diagram**

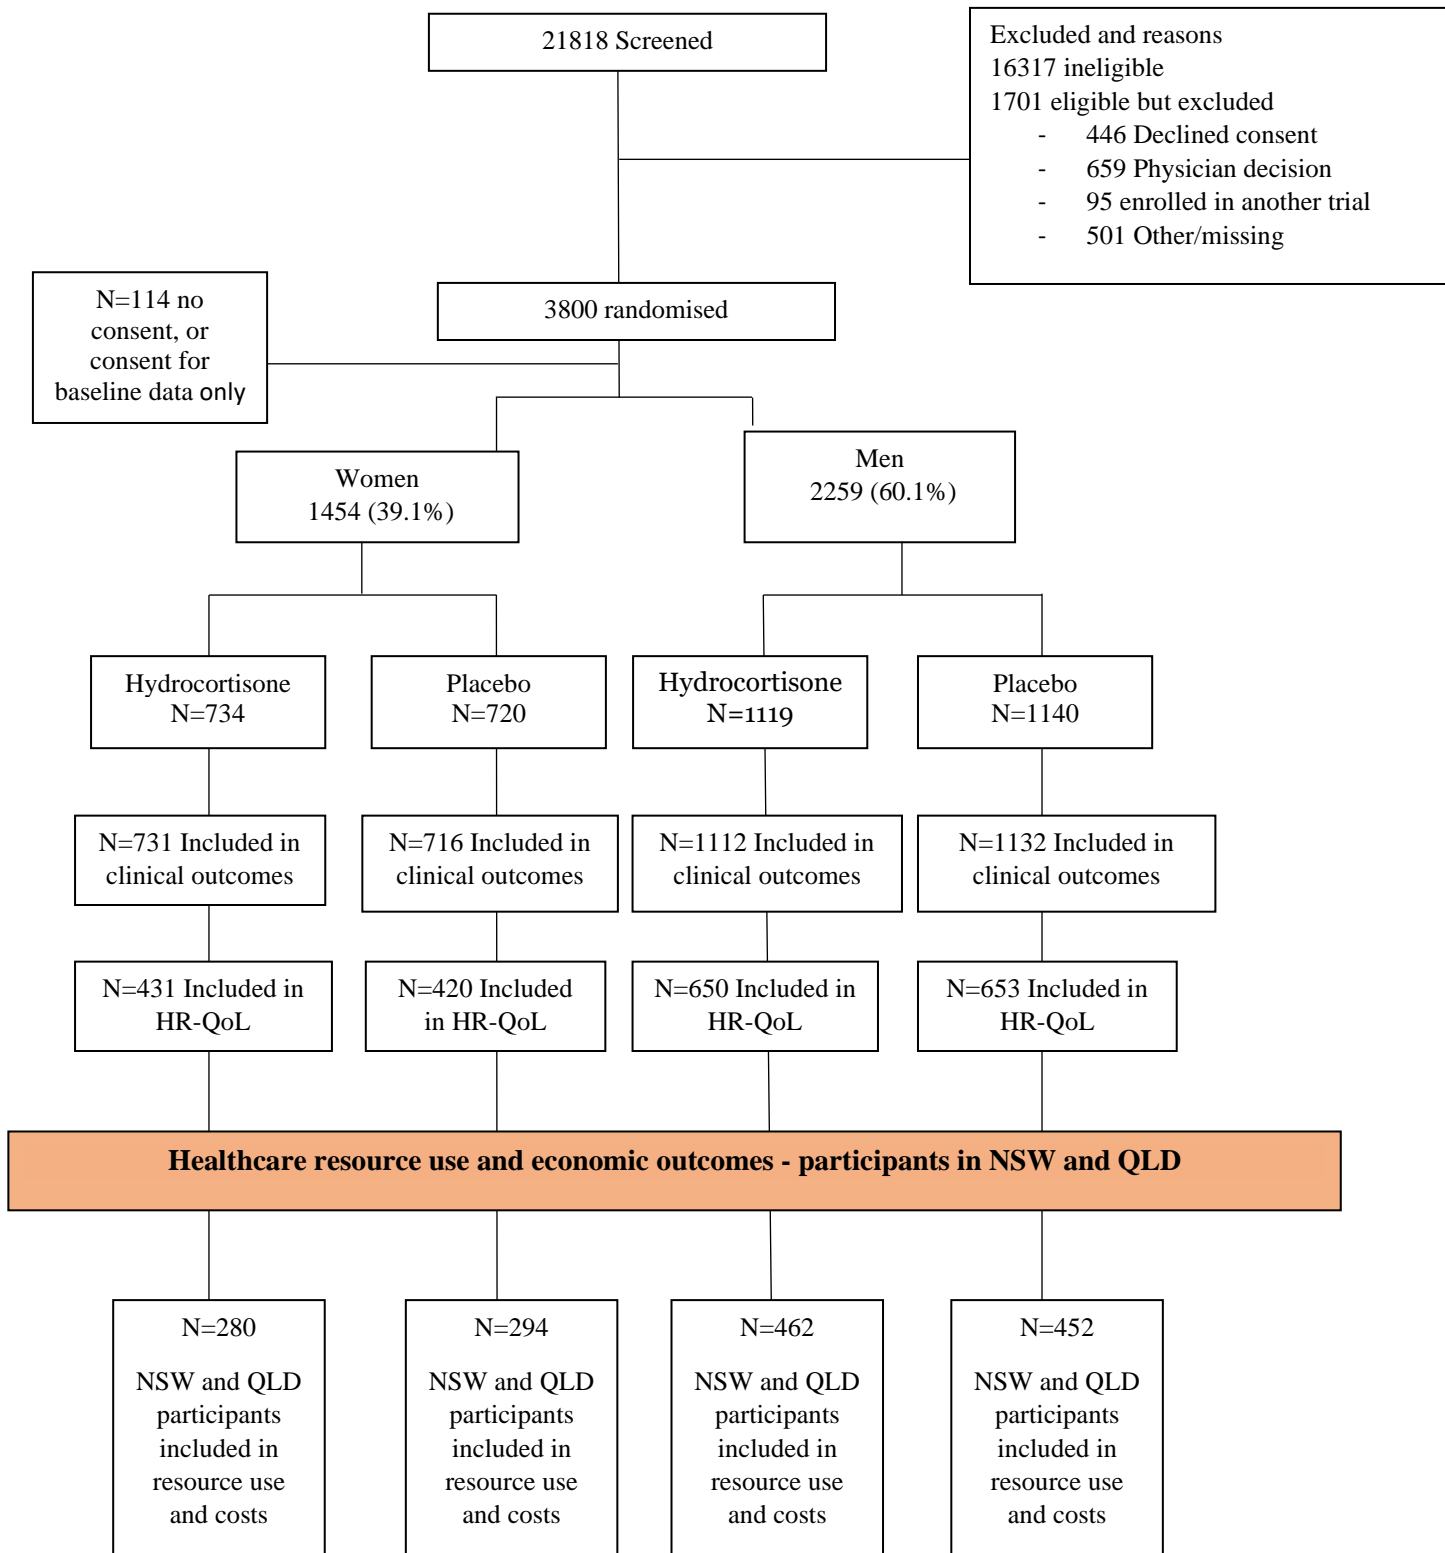

Abbreviations: HR-QoL Health-related quality-of-life, NSW New South Wales, QLD Queensland.



**Supplementary Table 1: Baseline characteristics by sex**

| <b>Characteristic</b>                                  | <b>Women<br/>N=1454</b> | <b>Men<br/>N=2259</b> | <b>p-value<br/>W:M</b> |
|--------------------------------------------------------|-------------------------|-----------------------|------------------------|
| Age: mean (SD)                                         | 61.8 (15.5)             | 63.0 (14.7)           | 0.01                   |
| Weight, kgs: mean (SD)                                 | 80.6 (26.9)             | 89.0 (25.7)           | <0.0001                |
| APACHE II score: mean (SD)                             | 23.6 (7.5)              | 24.2 (7.8)            | 0.04                   |
| <b>Admission type: n (%)</b>                           |                         |                       | 0.71                   |
| Non-operative                                          | 989/1451 (68.2)         | 1550/2255 (68.7)      |                        |
| Operative                                              | 462/1451 (31.8)         | 705/2255 (31.3)       |                        |
| <b>Admission source: n (%)</b>                         |                         |                       | 0.02                   |
| Emergency Department                                   | 437/1451 (30.1)         | 684/2255 (30.3)       |                        |
| Hospital Floor                                         | 325/1451 (22.4)         | 546/2255 (24.2)       |                        |
| Transfer from another ICU                              | 69/1451 (4.8)           | 94/2255 (4.2)         |                        |
| Transfer from another hospital                         | 149/1451 (10.3)         | 211/2255 (9.4)        |                        |
| Theatre following emergency surgery                    | 427/1451 (29.4)         | 605/2255 (26.8)       |                        |
| Theatre following elective surgery                     | 44/1451 (3.0)           | 115/2255 (5.1)        |                        |
| <b>Primary infection site: n (%)</b>                   |                         |                       | <0.0001                |
| Pulmonary                                              | 443/1447 (30.6)         | 857/2251 (38.1)       |                        |
| Intra-abdominal                                        | 362/1447 (25.0)         | 425/2251 (18.9)       |                        |
| Blood                                                  | 249/1447 (17.2)         | 392/2251 (17.4)       |                        |
| Skin                                                   | 97/1447 (6.7)           | 156/2251 (6.9)        |                        |
| Urinary                                                | 141/1447 (9.7)          | 138/2251 (6.1)        |                        |
| Central nervous system                                 | 6/1447 (0.4)            | 20/2251 (0.9)         |                        |
| Gut                                                    | 67/1447 (4.6)           | 90/2251 (4.0)         |                        |
| Endocarditis                                           | 8/1447 (0.6)            | 18/2251 (0.8)         |                        |
| Other                                                  | 74/1447 (5.1)           | 155/2251 (6.9)        |                        |
| <b>Physiological variables: mean (SD)</b>              |                         |                       |                        |
| Heart rate, beats per minute                           | 98 (22)                 | 94 (21)               | <0.0001                |
| Central venous pressure, mmHg                          | 12.2 (5.3)              | 12.0 (5.2)            | 0.20                   |
| Mean arterial pressure, mmHg                           | 72.1 (8.2)              | 72.5 (8.3)            | 0.16                   |
| Lowest mean arterial pressure, mmHg                    | 56.5 (9.0)              | 57.6 (8.6)            | 0.0001                 |
| Lowest PaO <sub>2</sub> /FiO <sub>2</sub> , mmHg       | 170.5 (93.4)            | 162.3 (90.3)          | 0.008                  |
| Lowest Haemoglobin g/L                                 | 101.6 (20.3)            | 106.9 (23.2)          | <0.0001                |
| Highest Arterial Lactate, mmHg                         | 3.9 (3.2)               | 3.7 (3.1)             | 0.03                   |
| Highest Creatinine umol/L                              | 173.4 (148.2)           | 202.5 (170.8)         | <0.0001                |
| Time from ICU admission to randomisation (hours)       | 22.5 (40.7)             | 30.7 (85.9)           | 0.0007                 |
| <b>Time of shock onset to randomisation</b>            |                         |                       | 0.35                   |
| < 6 hours                                              | 282/1444 (19.5%)        | 424/2249 (18.9%)      |                        |
| 6 to <12 hours                                         | 415/1444 (28.7%)        | 596/2249 (26.5%)      |                        |
| 12 to <18 hours                                        | 331/1444 (22.9%)        | 537/2249 (23.9%)      |                        |
| ≥18 hours                                              | 416/1444 (28.8%)        | 692/2249 (30.8%)      |                        |
| RRT in the 24 hours prior to randomisation: n (%)      | 185/1451 (12.7)         | 285/2255 (12.6)       | 0.92                   |
| Dialysis for chronic renal failure in last year: n (%) | 42/1451 (2.9)           | 76/2255 (3.4)         | 0.42                   |
| Statin therapy prior to randomisation: n (%)           | 278/1451 (19.2)         | 579/2255 (25.7)       | <0.0001                |

Abbreviations: SD=standard deviation; APACHE=Acute Physiological and Chronic Health Evaluation; mmHg=millimetres of mercury; PaO<sub>2</sub>/FiO<sub>2</sub>=ratio of arterial oxygen partial pressure (PaO<sub>2</sub>) to fractional inspired oxygen (FiO<sub>2</sub>); umol/L= millimoles per litre; g/L=grams per litre; RRT=renal replacement therapy. The lowest mean arterial pressure, PaO<sub>2</sub>/FiO<sub>2</sub>, haemoglobin and highest arterial lactate and creatinine were measured within 24 hours prior to randomisation.

**Supplementary Table 2: Impact of hydrocortisone treatment on septic shock outcomes by sex**

| <b>Characteristic</b>                                          | <b>Women<br/>HC - Placebo<br/>Mean difference<br/>(95% CI)</b> | <b>Men<br/>HC - Placebo<br/>Mean difference<br/>(95% CI)</b> | <b>Women minus. men<br/>Difference of mean<br/>differences<br/>(95% CI)</b> | <b>p-value</b> |
|----------------------------------------------------------------|----------------------------------------------------------------|--------------------------------------------------------------|-----------------------------------------------------------------------------|----------------|
| <b>All ADRENAL participants</b>                                |                                                                |                                                              |                                                                             |                |
| <i>Differences in days alive and free of at 90-days</i>        | <b>N=1447</b>                                                  | <b>N=2244</b>                                                |                                                                             |                |
| Mechanical ventilation                                         | -0.76 (-4.37, 2.85)                                            | 2.59 (-0.34, 5.52)                                           | -3.35 (-8.00, 1.29)                                                         | 0.15           |
| Renal replacement therapy                                      | -0.54 (-4.18, 3.10)                                            | 2.29 (-0.66, 5.25)                                           | -2.83 (-7.52, 1.85)                                                         | 0.23           |
| ICU                                                            | -0.47 (-3.98, 3.04)                                            | 2.64 (-0.21, 5.48)                                           | -3.11 (-7.62, 1.40)                                                         | 0.18           |
| Hospital                                                       | -0.88 (-4.11, 2.36)                                            | 2.08 (-0.54, 4.71)                                           | -2.96 (-7.12, 1.20)                                                         | 0.16           |
| <i>Difference in quality-of-life utility values (6-months)</i> | 0.02 (-0.02, 0.07)                                             | 0.01 (-0.03, 0.04)                                           | 0.02 (-0.08, 0.04)                                                          | 0.57           |
| <b>Participants in NSW and QLD</b>                             |                                                                |                                                              |                                                                             |                |
| <i>Differences in outcomes at 6-months</i>                     | <b>N=574</b>                                                   | <b>N=914</b>                                                 |                                                                             |                |
| initial length of ICU stay (days)                              | 0.95 (-0.84, 2.75)                                             | -0.85 (-2.27, 0.57)                                          | 1.80 (-0.49, 4.09)                                                          | 0.12           |
| duration of ICU readmissions (days)                            | 0.95 (-0.85, 2.74)                                             | -0.84 (-2.26, 0.58)                                          | 1.79 (-0.50, 4.08)                                                          | 0.12           |
| initial length of hospital stay (days)                         | 2.67 (-1.33, 6.67)                                             | 1.49 (-1.67, 4.66)                                           | 1.17 (-3.93, 6.27)                                                          | 0.65           |
| duration of post discharge hospital readmissions (days)        | 2.66 (-1.34, 6.66)                                             | 1.50 (-1.67, 4.67)                                           | 1.16 (-3.94, 6.26)                                                          | 0.65           |
| <i>Differences in costs at 6-months (€)</i>                    |                                                                |                                                              |                                                                             |                |
| ICU                                                            | -315 (-3897, 3266)                                             | 965.6 (-1882, 3813)                                          | -1280 (-5851, 3291)                                                         | 0.58           |
| Hospital                                                       | -1424 (-8472, 5113)                                            | 5102 (-500, 10706)                                           | -6527 (-15517, 2468)                                                        | 0.15           |

Abbreviations: HC = hydrocortisone. ICU = intensive care unit. NSW = New South Wales. QLD = Queensland

## References:

1. Billot, L., B. Venkatesh, J. Myburgh, et al., *Statistical analysis plan for the Adjunctive Corticosteroid Treatment in Critically Ill Patients with Septic Shock (ADRENAL) trial*. Crit Care Resusc, 2017. **19**(2): p. 183-191.
2. Venkatesh, B., S. Finfer, J. Cohen, et al., *Adjunctive Glucocorticoid Therapy in Patients with Septic Shock*. N Engl J Med, 2018. **378**(9): p. 797-808.
3. Swinburn, P., A. Lloyd, K.S. Boye, et al., *Development of a disease-specific version of the EQ-5D-5L for use in patients suffering from psoriasis: lessons learned from a feasibility study in the UK*. Value Health, 2013. **16**(8): p. 1156-62.
4. Janssen, M.F., A.S. Pickard, D. Golicki, et al., *Measurement properties of the EQ-5D-5L compared to the EQ-5D-3L across eight patient groups: a multi-country study*. Qual Life Res, 2013. **22**(7): p. 1717-27.
5. Norman, R., P. Cronin, and R. Viney, *A pilot discrete choice experiment to explore preferences for EQ-5D-5L health states*. Appl Health Econ Health Policy, 2013. **11**(3): p. 287-98.
6. Independent Hospital Pricing Authority, *National Hospital Data Collection, Australian Public Hospitals Cost Report 2013-2014 Round 18*. 2014.
7. Independent Hospital Pricing Authority, *National Hospital Cost Data Collection, Public Hospitals Cost Report, Round 20 (Financial year 2015-16)*. 2015.
8. Woodward, M., *Rationale and tutorial for analysing and reporting sex differences in cardiovascular associations*. Heart, 2019. **105**(22): p. 1701-1708.
9. Fine, J.P. and R.J. Gray, *A Proportional Hazards Model for the Subdistribution of a Competing Risk*. Journal of the American Statistical Association, 1999. **94**(446): p. 496-509.
10. Zhang, Z., *Survival analysis in the presence of competing risks*. Annals of translational medicine, 2017. **5**(3): p. 47-47.
11. Knaus WA, Draper EA, Wagner DP, Zimmerman JE. APACHE II: a severity of disease classification system. *Crit Care Med*. 1985;13(10):818-29.
